# Supplementary material for: Mild Chemical Treatment of Unsorted Urban Food Wastes
Source: MDPI journal article supplement (doi:10.3390/molecules28227670), 2023-11-20
Supplement: s1 [file s1]

**Table S1.** Data (% w/w referred to dry matter) for mass, C and N balance for fractions (Figure 2) isolated by membrane ultrafiltration of crude soluble matter listed in Table 2 obtained by centrifugation, hydrolysis and ozonisation of as collected MBW: i.e. the retentates at 750 kDa (R750), 100 kDa (R100), 20 kDa (R20), 0.2 kDa (R0.2) and the final permeate at 0.2 kDa (P0.2).

| <b>Mass yield</b>   | <b>Centrifugation</b> | <b>Hydrolysis</b> | <b>Ozonisation</b> |
|---------------------|-----------------------|-------------------|--------------------|
| R750                | 3.6                   | 27.1              | 13.1               |
| R100                |                       | 0.9               | 1.1                |
| R20                 | 0.3                   | 0.9               | 0.8                |
| R5                  | 5.5                   | 5.7               |                    |
| R0.2                |                       |                   | 3.0                |
| P0.2                | 90.6                  | 65.4              | 82.0               |
| C yield             |                       |                   |                    |
| R750                | 5.6                   | 40.6              | 26.6               |
| R100                |                       | 1.2               | 1.8                |
| R20                 |                       | 1.0               | 1.8                |
| R5                  | 5.7                   | 7.9               |                    |
| R0.2                |                       |                   | 4.9                |
| P0.2                | 88.7                  | 49.3              | 64.9               |
| N yield             |                       |                   |                    |
| R750                | 8.1                   | 30.9              | 86.9               |
| R100                |                       | 1.0               | 5.6                |
| R20                 |                       | 1.5               | 2.6                |
| R5                  | 5.8                   | 18.8              |                    |
| R0.2                |                       |                   | 1.3                |
| P0.2                | 86.1                  | 47.8              | 4.3                |
| Fractions content C |                       |                   |                    |
| R750                | 46.1                  | 41.4              | 39.0               |
| R100                |                       | 38.1              | 33.8               |
| R20                 |                       | 34.0              | 42.2               |
| R5                  | 30.7                  | 38.6              |                    |
| R0.2                |                       |                   | 30.17              |
| P0.2                | 29.0                  | 22.2              | 15.1               |
| Fractions content N |                       |                   |                    |
| R750                | 5.33                  | 1.80              | 6.58               |
| R100                |                       | 1.69              | 4.47               |
| R20                 |                       | 2.82              | 3.20               |
| R5                  | 2.52                  | 5.20              |                    |
| R0.2                |                       |                   | 4.17               |
| P0.2                | 2.24                  | 1.15              | 0.48               |
| C/N                 |                       |                   |                    |
| R750                | 8.6                   | 22.9              | 5.9                |
| R100                |                       | 22.6              | 7.4                |
| R20                 |                       | 12.1              | 13.2               |
| R5                  | 12.2                  | 7.4               |                    |
| R0.2                |                       |                   | 7.2                |
| P0.2                | 12.9                  | 19.3              | 31.4               |

**Table S2.** C types and functional groups<sup>a</sup> relative composition<sup>b</sup> as % mole/mole relative to total organic C for Table 1 MBW proximates, for crude soluble and insoluble products in Table 2 and for the retentates and permeates fractions of the crude soluble products in Figure 2 and 3.

| Signal chemical shift ( $\delta$ , ppm) | 0-53 | 53-63             | 63-95 | 95-110            | 110-140           | 140-160           | 160-185 |
|-----------------------------------------|------|-------------------|-------|-------------------|-------------------|-------------------|---------|
| Product/C type <sup>a</sup>             | Af   | NR                | OR    | OCO               | Ph                | PhOY              | COX     |
| Lipids (Table 1)                        | 92.7 | 0.82              | 0     | 0                 | 2.74              | 0                 | 3.70    |
| Mono-/disaccharides (Table 1)           | 28.0 | 8.82              | 38.7  | 4.14              | n.d. <sup>c</sup> | n.d. <sup>c</sup> | 12.1    |
| Hemicellulose/protein (Table 1)         | 34.9 | 6.39              | 16.1  | 4.28              | 13.4              | n.d. <sup>c</sup> | 22.4    |
| Lignin (Table 1)                        | 13.6 | 9.44              | 35.6  | 8.48              | 12.7              | 9.13              | 5.51    |
| Pristine MBWS SM (Table 2)              | 32.6 | 6.05              | 28.9  | 2.92              | 8.24              | n.d. <sup>c</sup> | 17.1    |
| Pristine MBWS IM (Table 2)              | 19.4 | 7.94              | 48.1  | 9.77              | 4.96              | n.d. <sup>c</sup> | 7.46    |
| Hydrolysed SM (Table 2)                 | 52.0 | n.d. <sup>c</sup> | 12.1  | 1.33              | 10.2              | n.d. <sup>c</sup> | 16.2    |
| Hydrolysed IM (Table 2)                 | 39.6 | 3.45              | 32.7  | 7.17              | 6.40              | n.d. <sup>c</sup> | 9.86    |
| Ozonized SM (Table 2)                   | 37.2 | n.d. <sup>c</sup> | 9.56  | 3.00              | n.d. <sup>c</sup> | n.d. <sup>c</sup> | 22.7    |
| Ozonized IM (Table 2)                   | 23.9 | 8.02              | 46.3  | 9.21              | n.d. <sup>c</sup> | n.d. <sup>c</sup> | 7.91    |
| Pristine MBWS R750 (Table 3)            | 48.5 | 12.9              | 17.1  | 5.06              | 4.07              | n.d. <sup>c</sup> | 11.0    |
| Hydrolysed R750 (Table 3)               | 43.1 | 6.08              | 30.1  | 6.18              | 6.55              | n.d. <sup>c</sup> | 7.22    |
| Ozonised R750 (Table 3)                 | 69.4 | n.d. <sup>c</sup> | 7.54  | n.d. <sup>c</sup> | n.d. <sup>c</sup> | n.d. <sup>c</sup> | 15.2    |
| Ozonised R100 0 (Table 3)               | 46.4 | 8.29              | 20.1  | 4.10              | 4.02              | n.d. <sup>c</sup> | 16.6    |

<sup>a</sup>Data for aliphatic and/or cycloaliphatic (Af), amine (NR), alkoxy (OR), anomeric (OCO), aromatic (Ph), phenol and phenoxy (PhOY, Y = H and/or R), carboxylic and amide (COX, X = OR, OM, NR-) C, R = H, alkyl and/or aryl C. <sup>b</sup>see Materials and Methods section. <sup>c</sup>not distinguished from the background noise.

**Table S3.** Relative chemical composition of water soluble products (see Figure 4) obtained with the multistep treatment in Figure 1B [12, 21].

| Signal chemical shift ( $\delta$ , ppm)                                         | 0-53 | 53-63 | 63-95 | 95-110 | 110-160 | 160-185 | MW      |
|---------------------------------------------------------------------------------|------|-------|-------|--------|---------|---------|---------|
| Product <sup>a</sup> /C type <sup>b</sup> and MW                                | Af   | NR    | OR    | OCO    | Ph/PhOY | COX     | kDa     |
| Hydrolysis crude soluble product from anaerobic digestate [21]                  | 43   | 10    | 14    | 3      | 13      | 16      | ≥ 750   |
| Hydrolysis soluble R <sub>750</sub> from anaerobic digestate [21]               | 49   | 8     | 13    | 4      | 8       | 14      |         |
| Hydrolysis soluble R <sub>150</sub> from anaerobic digestate [21]               | 42   | 10    | 15    | 4      | 11      | 18      |         |
| Hydrolysis soluble R <sub>100</sub> from anaerobic digestate [21]               | 39   | 10    | 11    | 3      | 12      | 21      | 100-150 |
| Ozonisation soluble R <sub>750</sub> from anaerobic digestate [21]              | 74   | 1     | 3     | 3      | 9       | 6       | ≥ 750   |
| Ozonisation soluble R <sub>150</sub> from anaerobic digestate <sub>s</sub> [21] | 73   | 3     | 1     | 2      | 8       | 8       | 150-750 |
| Ozonisation soluble R <sub>100</sub> from anaerobic digestate [21]              | 50   | 6     | 8     |        | 7       | 26      | 100-150 |
| Hydrolysis crude soluble product from CGD compost [12]                          | 41   | 7     | 14    | 4      | 18      | 15      | 77      |
| Hydrolysis soluble R <sub>35</sub> from CGD compost [12]                        | 22   | 9     | 9     | 3      | 33      | 23      | 279     |
| Ozonisation crude soluble product from CGD compost [12]                         | 20   | 6     | 3     | 2      | 20      | 48      | 487     |
| Ozonisation soluble R <sub>35</sub> from CGD compost [12]                       | 62   | 5     | 9     | 5      | 5       | 13      |         |
| Hydrolysis crude soluble product from CG compost [12]                           | 37   | 7     | 14    | 4      | 20      | 18      | 80      |

|                                              |    |    |    |   |    |    |     |
|----------------------------------------------|----|----|----|---|----|----|-----|
| Hydrolysis soluble R35 from GG compost [12]  | 27 | 8  | 8  | 3 | 32 | 23 | 18  |
| Ozonisation crude soluble GG compost [12]    | 17 | 6  | 7  | 3 | 22 | 44 |     |
| Ozonisation soluble R35 from CG compost [11] | 50 | 10 | 13 | 3 | 5  | 18 | 223 |

<sup>a</sup>Legends as for Figure 4.

**Table S4.** Surface tension ( $\gamma$ , mN m<sup>-1</sup>)<sup>a</sup> of products in Figure 3 and 4.

| Product                                                       | $\gamma$ , mN m <sup>-1</sup> |
|---------------------------------------------------------------|-------------------------------|
| Centrifugation soluble R750 (Figure 3C)                       | 47.1±0.2 a                    |
| Hydrolysis soluble R750 (Figure 3C)                           | 42.2±0.2 b                    |
| Ozonisation soluble R750 (Figure 3C)                          | 54.0±0.1 c                    |
| Hydrolysis soluble R35 from CGD compost (Figure 4A)           | 59.8±0.1 d                    |
| Hydrolysis soluble R35 from CG compost (Figure 4A)            | 59.2±0.2 e                    |
| Hydrolysis soluble R750 from anaerobic digestate (Figure 4A)  | 56.8±0.3 f                    |
| Ozonisation soluble R750 from anaerobic digestate (Figure 4B) | 39.5±1.0 g                    |
| Hydrolysis soluble R150 from anaerobic digestate (Figure 4A)  | 57.3±0.2 f                    |
| Ozonisation soluble R150 from anaerobic digestate (Figure 4B) | 36.8±0.6 g                    |
| Hydrolysis soluble R100 from anaerobic digestate (Figure 4A)  | 54.2±0.3 h                    |
| Ozonisation soluble R100 from anaerobic digestat (Figure 4B)  | 43.6±2.3 i                    |

<sup>a</sup>Values followed by different letters are significantly different at P<0.01 level
